# Supplementary material for: Unraveling Drug Penetration of Echinocandin Antifungals at the Site of Infection in an Intra-abdominal Abscess Model
Source: PubMed Central journal article supplement (PMC5610477; doi:10.1128/aac.01009-17), 2017-09-22
Supplement: AAC.01009-17_zac010176564s1.pdf [file AAC.01009-17_zac010176564s1.pdf]

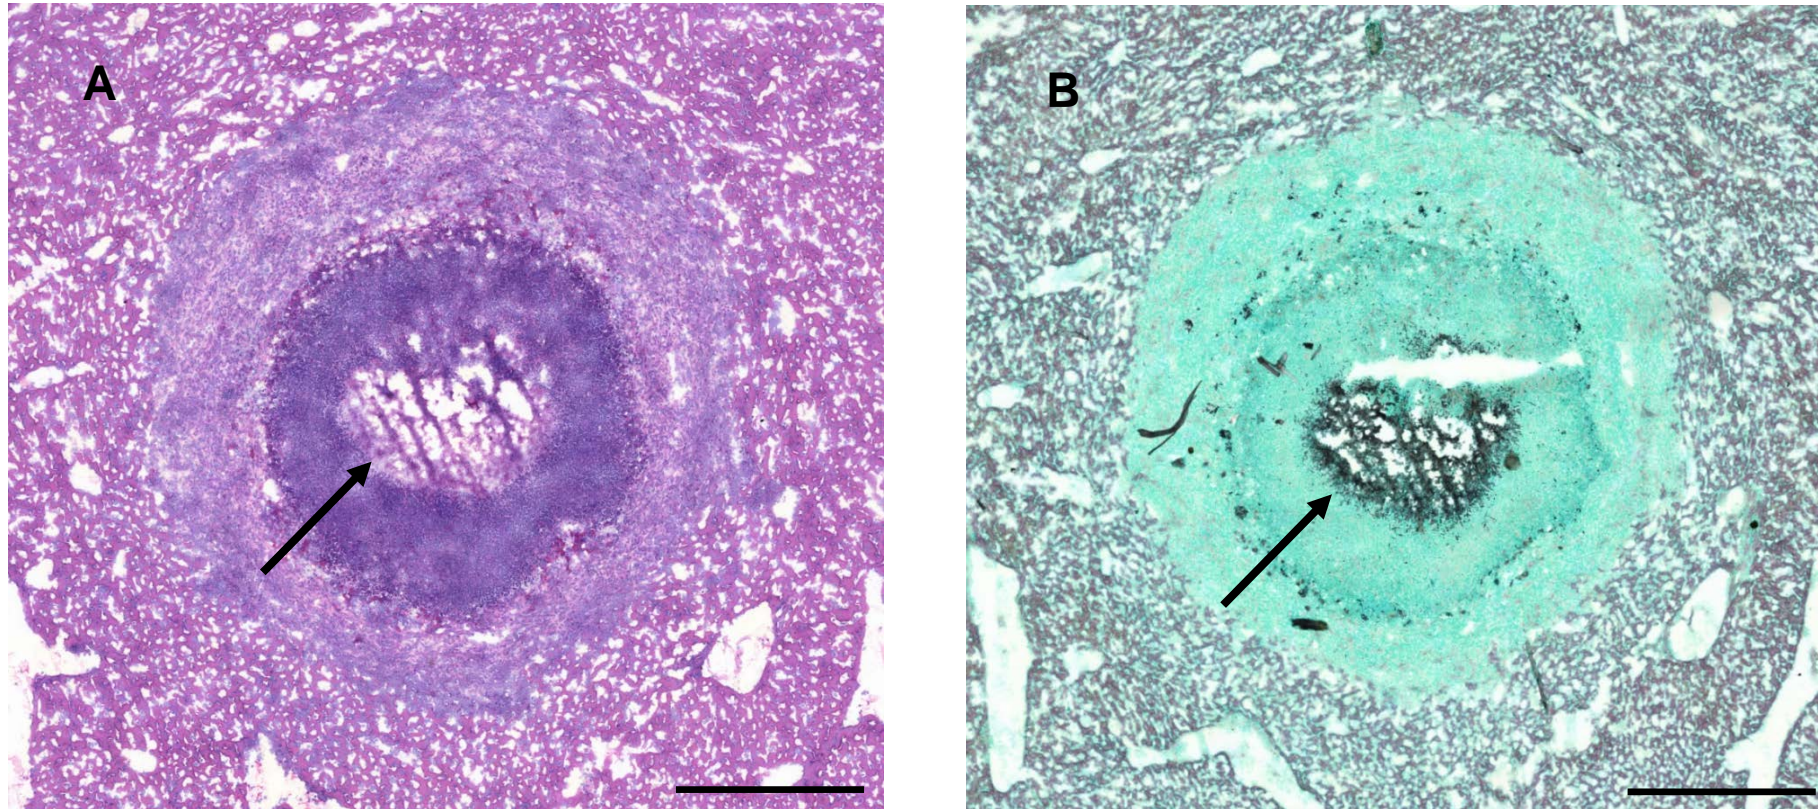

**Supplementary Figure 1. Enlarged H&E and GMS staining of one liver lesion.** Liver lesions are characterized by densely-packed neutrophils surrounding a highly necrotic acellular core (black arrow shown in panel A). GMS stain of fungi distribution (black arrow shown in Panel B) correlates with highly necrotic center of lesion.

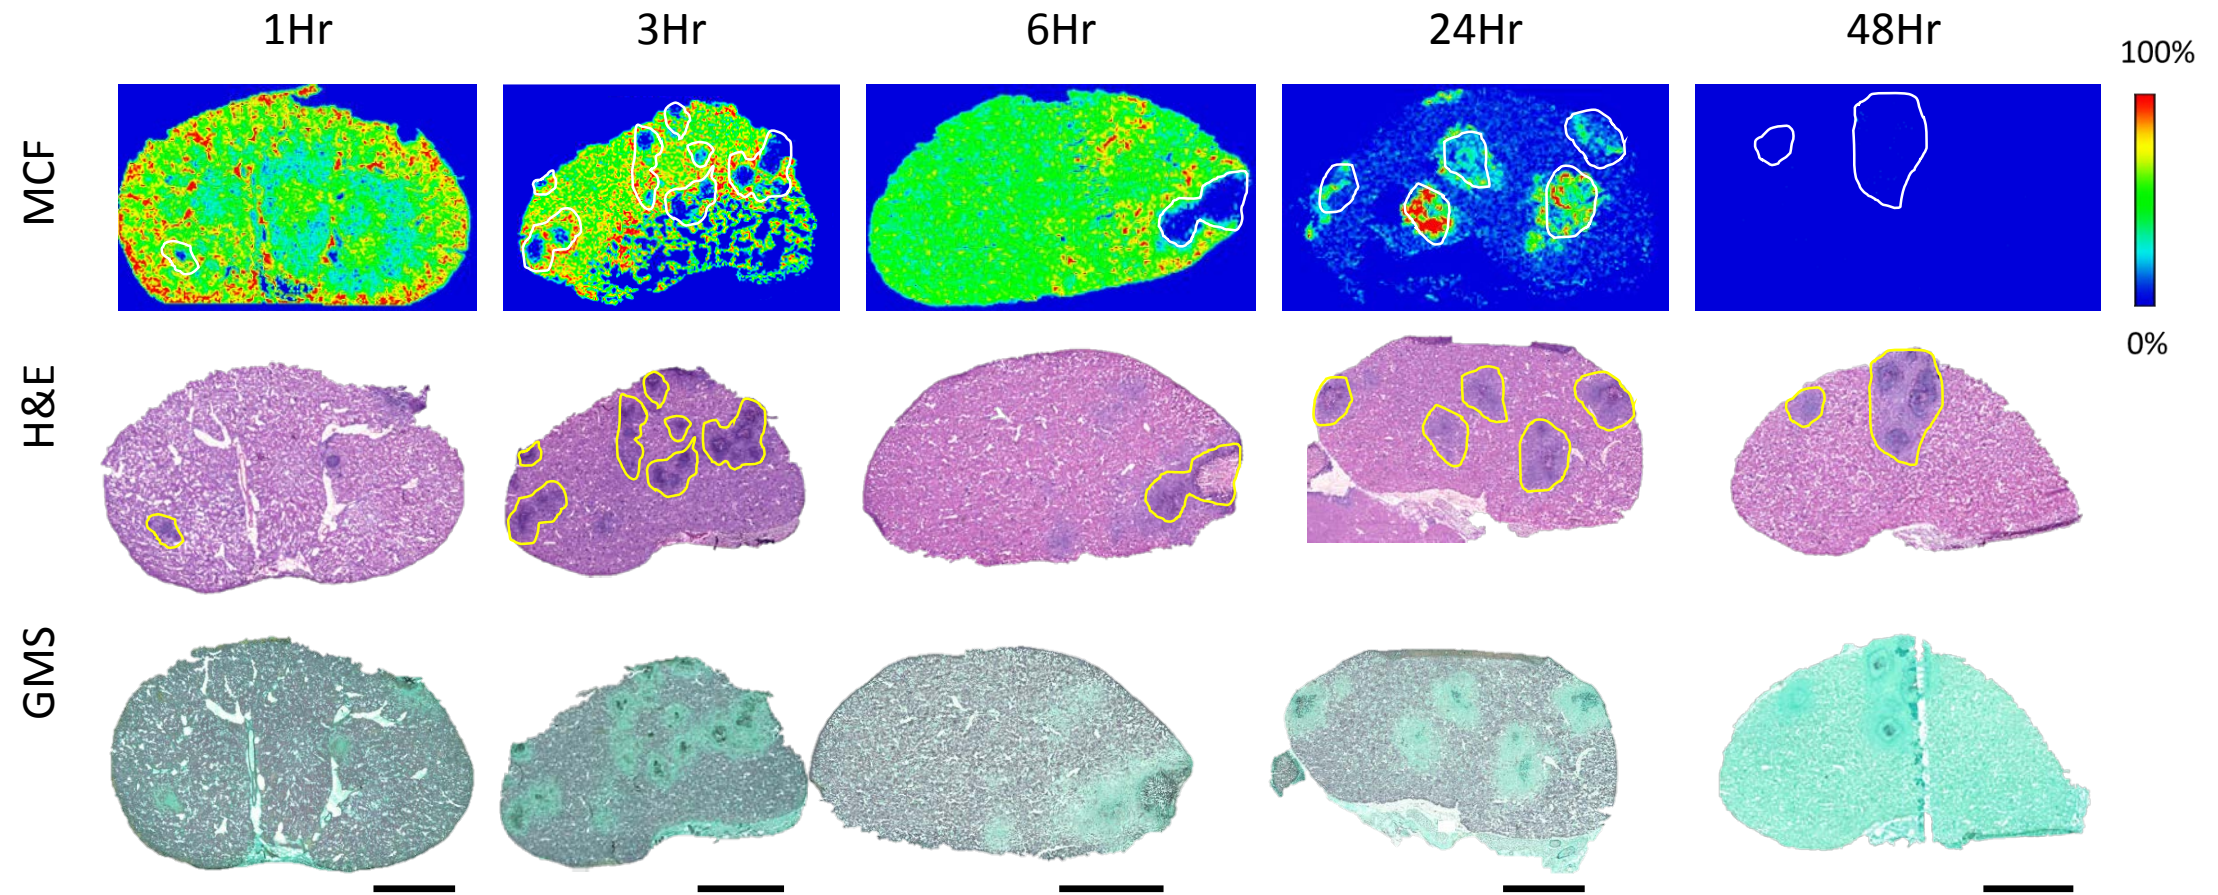

**Supplementary Figure 2. Drug distribution in infected kidneys post single dose micafungin and CD101.**

**(a)** Upper row: Ion maps of micafungin in representative kidney tissues collected at 1, 3, 6, 24, and 48h post a single dose of micafungin at 5 mg/kg; signal intensity color bar is fixed for micafungin, with gradually increased intensity from blue (no signal) to red (max signal); H&E and GMS staining of adjacent sections are shown below each set of ion maps. Outlines highlight the lesion area on each tissue section. Scale bars, 3 mm.

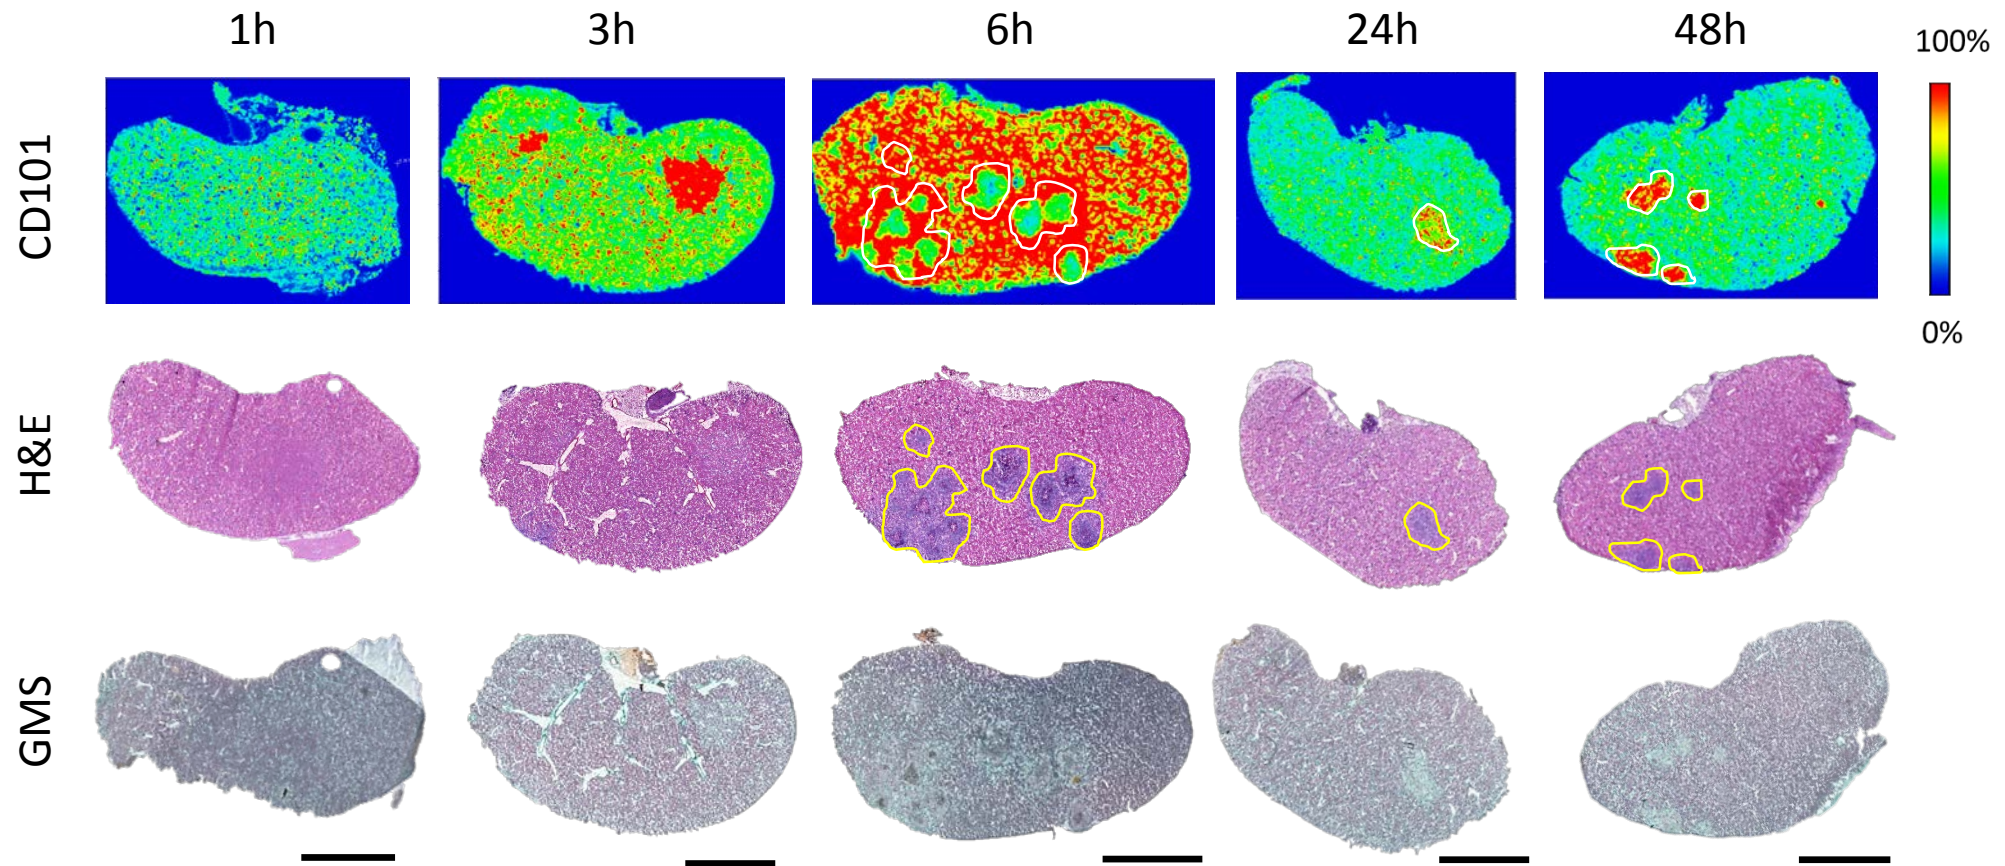

**Supplementary Figure 2b.** Upper row: Ion maps of CD101 in representative kidney tissues collected at 1, 3, 6, 24, and 48h post a single dose of CD101 at 20 mg/kg; signal intensity color bar is fixed for CD101, with gradually increased intensity from blue (no signal) to red (max signal). Matched H&E and GMS staining results are shown in the middle and bottom rows, respectively. Scale bars, 3 mm.
